# Supplementary material
Source: publisher figshare collection journal article supplement (https://adisjournals.figshare.com/articles/dataset/_/6015344)
Supplement: Supplementary file 1 [file 1]

## Past, Present and Future Approaches to the Prevention and Treatment of Respiratory Syncytial Virus Infection in Children

Eric A. F. Simões • Louis Bont • Paolo Manzoni • Brigitte Fauroux • Bosco Paes • Josep Figueras-Aloy • Paul A. Checchia • Xavier Carbonell-Estrany

Infect Dis Ther. 2018 [Epub ahead of print]

This slide deck represents the opinions of the authors. Sponsorship for this project was funded by AbbVie. Medical writing assistance for this study was provided by Strategen Ltd. For a full list of acknowledgments and conflicts of interest for all authors of this article, please see the full text online. Copyright © The Authors 2018. Creative Commons Attribution Noncommercial License (CC BY-NC).

## Abbreviations

- AE: Adverse event
- BCG: Bacille Calmette Guerin
- BLP: Bacterium-like particle
- BPD: Bronchopulmonary dysplasia
- CHD: Congenital heart disease
- CLD: Chronic lung disease
- DNA: Deoxyribonucleic acid
- FDA: Food and Drug Administration
- HSCT: Hematopoietic stem cell transplantation
- IM: Intramuscular
- IV: Intravenous
- LRTI: Lower respiratory tract infection
- mAB: Monoclonal antibody
- MVA: Modified vaccinia virus Ankara
- PATH: Program for Appropriate Technology in Health
- PIV: Parainfluenza virus
- RCT: Randomized controlled trial
- RNA: Ribonucleic acid
- RSV: Respiratory syncytial virus
- RSV-IGIV: Respiratory syncytial virus immune globulin intravenous
- RSVH: Respiratory syncytial virus hospitalization
- SeV: Sendai virus
- SOE: Strength of evidence
- URTI: Upper respiratory tract infection
- VLP: Virus-like particle
- wGA: Weeks gestational age
- WHO: World Health Organization

## REGAL 7: Past, present and future approaches to the prevention and treatment of RSV

- The methodology followed that of the predetermined protocol outlined in REGAL 1
  - The target population consisted of children aged  $\leq 18$  years with or without comorbidities or risk factors for RSV
- Selected non-Western studies\* of relevance or importance were included to supplement the evidence base
- Outcomes of interest for this review included:
  - Incidence and epidemiology of RSV following:
    - Prophylactic intervention
    - Treatment therapies
- A second non-systematic review was used to identify and evaluate promising new therapies and vaccines for RSV

\*REGAL primarily focused on studies conducted in Western countries, defined as: the United States, Canada, and Europe (including Turkey and the Russian Federation)

## Systematic review

- 1,441 studies\* were identified of which 161 were included

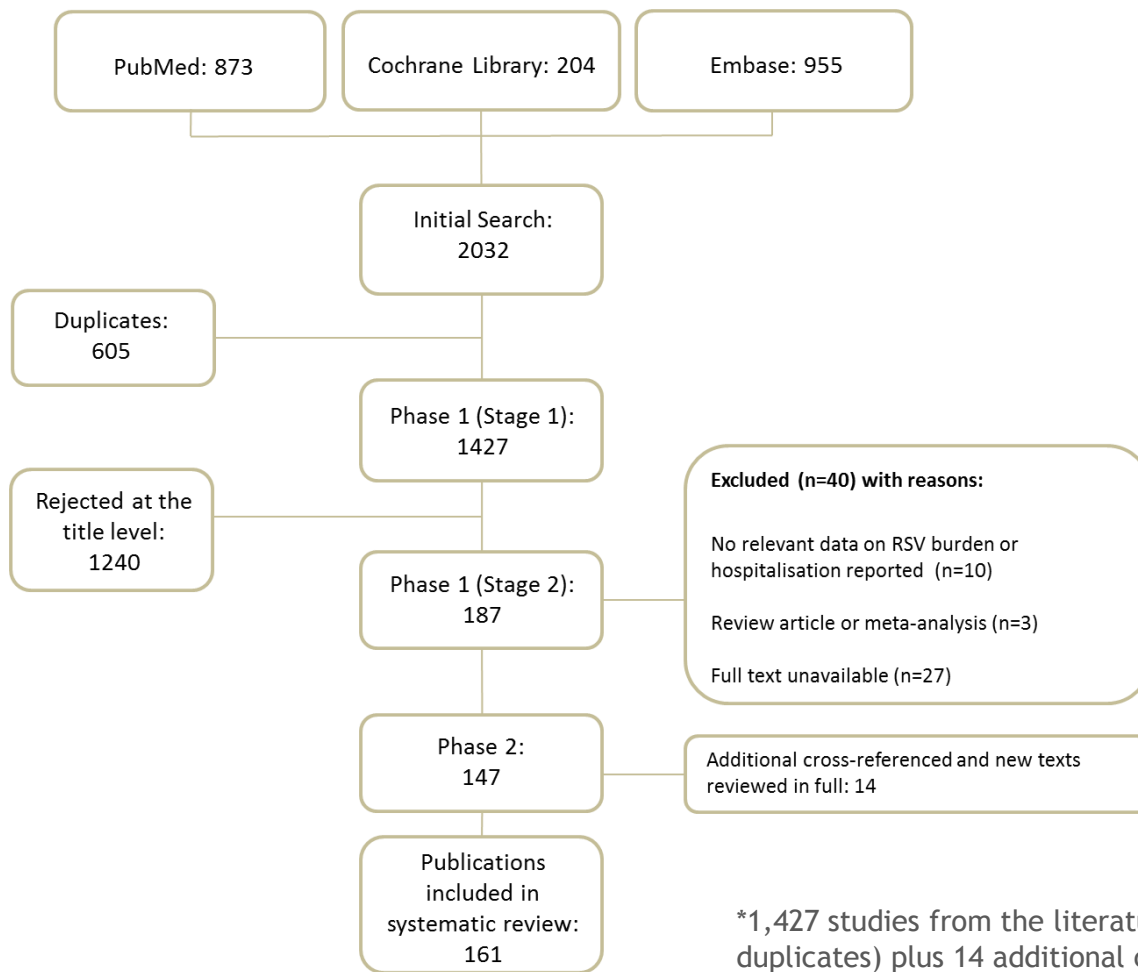

## RSV-IGIV was the first prophylactic agent to be approved by the FDA for the prevention of RSV in preterm infants

- Polyclonal human IV antibody preparation enriched for RSV neutralizing activity
  - first successful prophylactic agent shown to prevent severe RSV LRTI in infants and children <2 years
- Pivotal trials included NIAID (1993)<sup>1</sup>, PREVENT (1997)<sup>2</sup> and CARDIAC (1998)<sup>3</sup>
- Licensed by the FDA in 1996 for prevention of RSV LRTI in **preterm infants** (<36 wGA) and **infants <24 months with BPD**
  - Indication limited to preterm infants **without CHD** due to safety concerns and apparent lack of efficacy in some populations
  - RSV-IGIV was voluntarily withdrawn from market in 2003 following successful licensure of a monoclonal antibody preparation

1. Groothuis JR et al. N Engl J Med. 1993;329:1524-30; 2. The PREVENT Study Group. Pediatrics. 1997;99:93-9; 3. Simões EAF et al. J Pediatr. 1998;133:492-9.

## Palivizumab was effective in the prevention of RSV LRTI and RSVH in children

- Humanized mAB
  - Administered by monthly 15 mg/kg IM injection during the RSV season
  - Licensed in 1998
- Shown to be effective in high-risk subgroups e.g. infants with CHD or preterm infants with and without BPD/CLD
- Palivizumab has been shown to be well-tolerated
  - AEs similar to that of placebo
  - Safety profile confirmed by real-world evidence, including in children with complex medical disorders
- Guidelines restrict use of palivizumab to highest-risk subpopulations due to cost-benefit considerations

## Palivizumab was effective in the prevention of RSV LRTI and RSVH in infants born preterm or with CHD and/or CLD/BPD

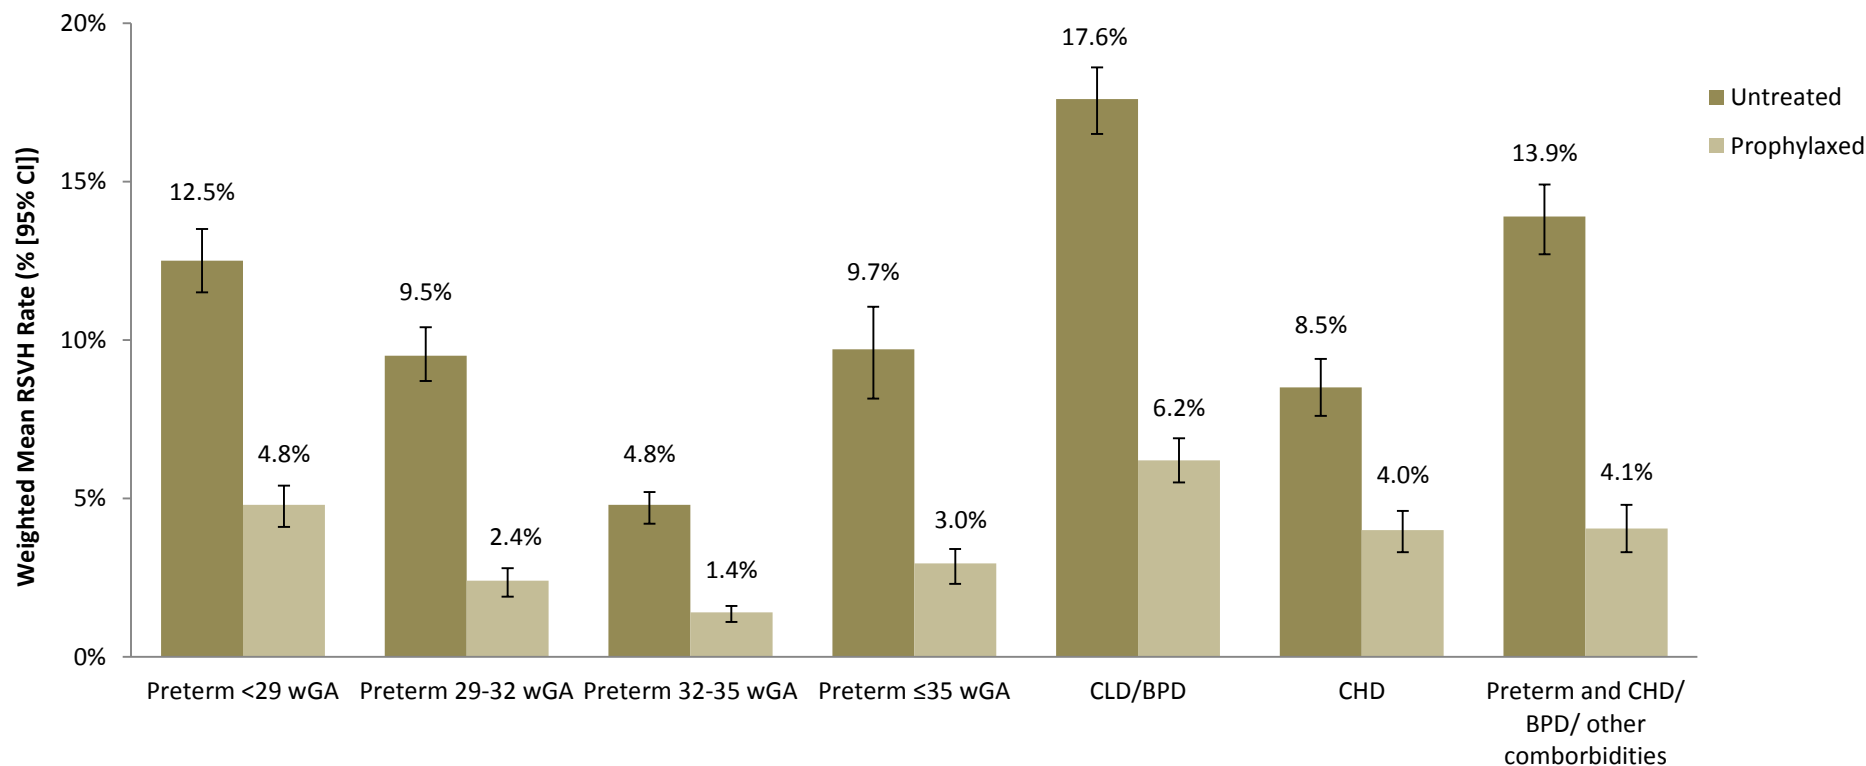

Prophylaxis with palivizumab reduced the risk of RSVH in subpopulations prone to RSV

## Palivizumab has been used in prevention of RSV LRTI/RSVH in other subgroups

- Down syndrome
  - Medical need for prevention of RSVH in infants and children with Down syndrome is high
  - RSVH rates in children with Down syndrome receiving palivizumab are low
- Cystic fibrosis
  - Evidence is relatively limited and inconclusive
    - Palivizumab registry data
    - Lack of suitably powered studies
- Other significant underlying medical conditions
  - Neuromuscular disease and congenital airway anomalies

There is growing evidence for palivizumab use in high-risk subgroups outside those addressed in the guidelines



## Motavizumab has been shown to be non-inferior to palivizumab

- Second generation humanized mAB derived from palivizumab
  - Exhibited 10-fold greater activity in preclinical studies
- Clinically assessed in two pivotal trials: Carbonell-Estrany et al (2009)<sup>1</sup> and Feltes et al (2011)<sup>2</sup>
  - Overall, motavizumab was non-inferior to palivizumab
  - Cutaneous AEs were more frequently reported in motavizumab-treated patients
- FDA license application rejected in 2010

Motavizumab has a more significant adverse event profile than the first-generation prophylactic agent palivizumab

1. Carbonell-Estrany X et al. Pediatrics. 2009;125:e35-51; 2. Feltes TF et al. Pediatr Res. 2011;70:186-91.

## There are limited data on the long-term impact of existing RSV prophylactic measures

### RSV-IGIV

- Long-term follow-up of infants with BPD/CLD showed improved lung function in those treated with RSV-IGIV versus non-RSV-IGIV-treated infants

### Palivizumab

- Incidence of recurrent wheezing has been shown to be significantly lower in palivizumab-treated infants versus non-treated infants
  - Data was ambivalent on whether this effect is limited to:
    - Those with a family history of atopy
    - Those without a family history of atopy
    - All infants regardless of atopic background

## There are limited effective treatment options currently available for RSV

### Ribavirin

- Approved in 1986 for aerosolized treatment of RSV
- Use often limited to immunocompromised infants
  - Shown to reduce risk of progression from URTI to LRTI and all-cause mortality in RSV-positive HSCT patients (aged 3-70)
  - Limited data showing its efficacy at reducing incidence of airway reactivity in previously healthy infants
- Ribavirin may be used along with other prophylactic agents
- Significant data supporting its use is lacking, and there are some toxicity concerns
- Cost of aerosolized ribavirin is prohibitive
- Not currently recommended in guidelines as a treatment option

## Future approaches to RSV therapy: Vaccines

There remains a significant unmet need for efficacious and cost-effective, preventive interventions against RSV

### The Past

- The first RSV vaccine in the 1960s failed to protect infants
  - Formalin-inactivated, alum-precipitated RSV vaccine (FI-RSV)
  - Severe AEs in vaccinated native infants who subsequently were infected with RSV
  - Failure has influenced subsequent investigations to the present day

### The Future

- There are currently:
  - ~28 RSV vaccines and antibodies in pre-clinical development
  - 17 vaccines and antibodies in clinical development
- WHO estimates an available vaccine in 5-10 years

## PATH global snapshot of RSV vaccines in development

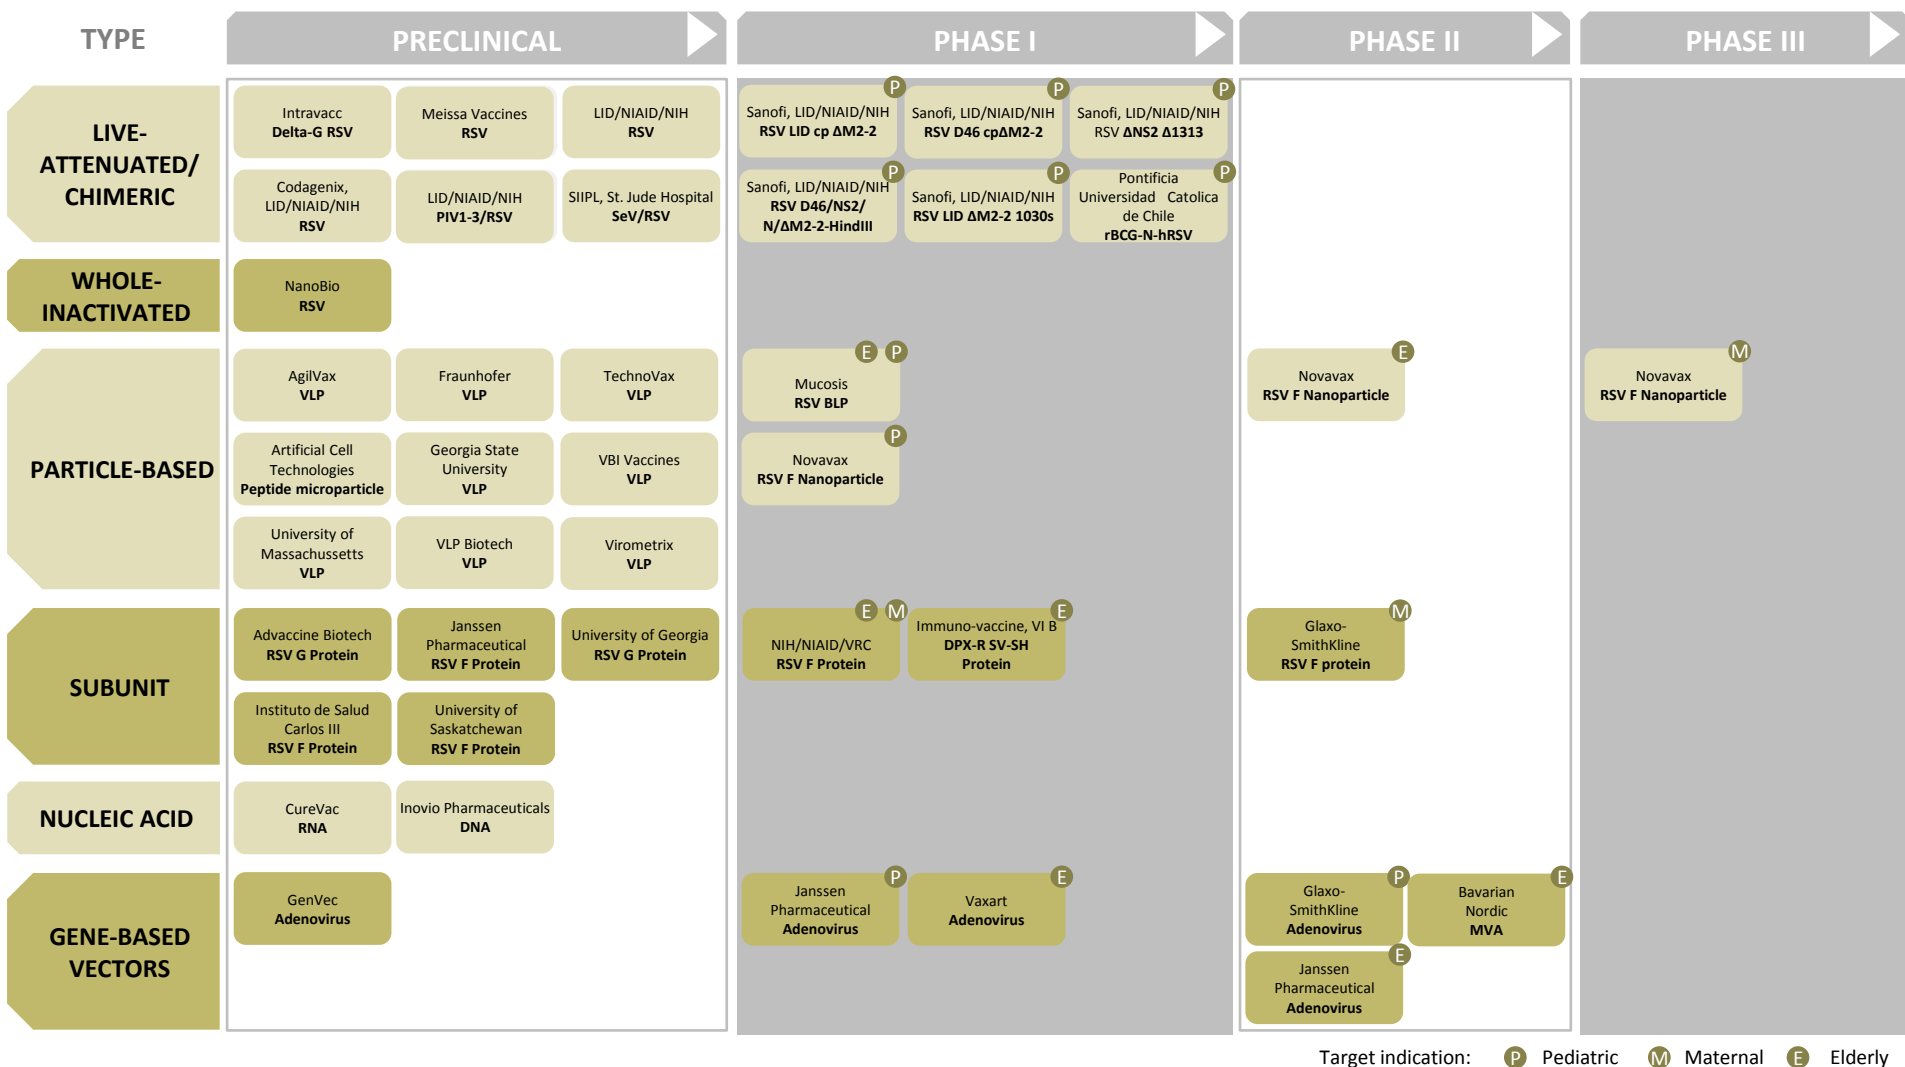

Target indication:  Pediatric  Maternal  Elderly

## Target populations for RSV vaccines

Young infants ( $\leq 6$  months of age) and young children ( $> 6$  months)

- Risk of severe RSV-associated respiratory disease is highest in infants  $< 6$  months
- Protective maternal neutralizing antibodies are known to suppress development of serum and antibody responses
- Live-attenuated, vector-based and subunit vaccines appear optimal for the pediatric population
- Live-attenuated vaccine approach:
  - Advantages
    - Little risk of inducing enhanced disease with a subsequent RSV infection
    - Can be delivered intranasally
    - Can replicate in the presence of maternal antibodies
    - Can broadly stimulate innate, humoral and cellular immunity
  - Disadvantages
    - Balancing safety versus immunogenicity
    - Risk of reversion to wild-type
    - Producing a stable vaccine virus for mass production
- Vector-based approach:
  - Advantages
    - Avoids concerns about attenuation level of a live-attenuated virus vaccine and risk of enhanced disease with subunit approach
    - Reduces the likelihood that maternal antibodies would inhibit an immune response in young infants
  - Disadvantages
    - Potential for the development of anti-vector immunity

## Target populations for RSV vaccines

### Pregnant women

- Maternal immunization avoids challenges of direct neonatal immunization when the neonatal immune system shows impaired antibody affinity maturation and less efficient antigen presentation
- Nanoparticle and subunit vaccines are the most promising for pregnant women
- Aim of vaccinating in pregnancy (2<sup>nd</sup>/3<sup>rd</sup> trimester) is to:
  - Boost maternal RSV antibody level for transplacental transfer above the risk threshold of severe disease in their infants
  - Maintain this putatively protective level for longer (ideally 4-6 months of life)
- Any vaccine administered to pregnant women will need to meet high tolerability and safety standards

## Future approaches to RSV therapy: Prophylaxis

The previous success of monoclonal antibodies has promoted research into new monoclonal RSV therapies with improved capacity to block the fusion (F) protein

### MEDI8897

- Recombinant, human immunoglobulin G1 kappa monoclonal antibody
- Targets pre-fusion conformation of the RSV F protein
- Potency and half-life supports once-per-RSV season dosing
- Has received fast track designation for continuing FDA assessment

### RI-001

- An RSV-IGIV
- Compassionate use in 15 immunocompromised patients (2 mo - 71 yrs) was well tolerated and significantly increased serum neutralizing antibody titers to RSV
- Undergoing safety trial for RSV-LRTI prevention in immunocompromised infants



## Future approaches to RSV therapy: Treatment

Treatment of RSV infection is focussed on preventing viral entry into target cells, viral replication, or assembly of viral particles, e.g.

### ALX-0171

- Inhaled trimeric nanobody
- Phase 1/2a study has shown:
  - Rapid effect on viral replication
  - No treatment-related AEs
- Phase 2 dose-ranging study underway

### GS-5806 (Presatovir)

- Inhibitor that blocks viral-envelope fusion with the host-cell membrane
- Shown to reduce viral load and symptom severity scores in adults

### JNJ64041575 (lumicitabine)

- Oral, large-protein, RSV replication inhibitor
- Phase 2 study in adults has shown lower peak viral load, symptom score and mucus weight vs. placebo
- Phase 2 study in infants and children (28 days to 36 months) hospitalized with RSV infection underway

## Future approaches to RSV therapy: Treatment Candidates

- |                                                                                       |                                                                                                                                     |
|---------------------------------------------------------------------------------------|-------------------------------------------------------------------------------------------------------------------------------------|
| • Fusion inhibitors                                                                   | • GS-5806, MDT-637 (VP-14637); JNJ-2408068 (R-170591); TMC353121; BMS-433771; BTA-C585; P13 and C15; JNJ-53718678; AK-0529; RFI-641 |
| • Single domain, trivalent antibody fragment derived from <i>Camelidae</i> (Nanobody) | • ALX-0171                                                                                                                          |
| • L (“large”)-protein inhibitors                                                      | • JNJ-64041575; BI-D; AZ-27                                                                                                         |
| • N-protein targeting RSV inhibitor                                                   | • RSV604                                                                                                                            |

Other potential targets include: N-P protein-protein interaction; SH-protein; M2-1 protein

## Concluding statements

| Key Findings                                                                                                                                                                                                                                                                                                                                                                                                                                                                                                                                                                         | SOE  |
|--------------------------------------------------------------------------------------------------------------------------------------------------------------------------------------------------------------------------------------------------------------------------------------------------------------------------------------------------------------------------------------------------------------------------------------------------------------------------------------------------------------------------------------------------------------------------------------|------|
| <b>Palivizumab</b> <ul style="list-style-type: none"><li>• Currently the only product licensed for prophylaxis against RSV</li><li>• Preterm infants &lt;35 wGA: 68% (range: 64-100%) reduction in RSVH [absolute risk reduction: 0.2-14.7%]</li><li>• Children with CLD/BPD: 65% (range: 38-72%) reduction in RSVH [absolute risk reduction: 4.9-14.2%]</li><li>• Children with CHD: 53% (range: 45-58%) reduction in RSVH [absolute risk reduction: 4.4-4.6%]</li><li>• Limited data in other comorbidities</li><li>• Significantly reduced subsequent wheezing episodes</li></ul> | High |
| <b>Ribavirin</b> <ul style="list-style-type: none"><li>• Licensed for treatment of severe RSV infection</li><li>• Lack of evidence supporting its efficacy and concerns over toxicity</li><li>• Strongest evidence in immunocompromised infants</li></ul>                                                                                                                                                                                                                                                                                                                            | High |

## Concluding statements

| Key Findings                                                                                                                                                                                                                                                                                                                                                                                                                                                                                                                                                                                                                                                                                                                                                                                            | SOE |
|---------------------------------------------------------------------------------------------------------------------------------------------------------------------------------------------------------------------------------------------------------------------------------------------------------------------------------------------------------------------------------------------------------------------------------------------------------------------------------------------------------------------------------------------------------------------------------------------------------------------------------------------------------------------------------------------------------------------------------------------------------------------------------------------------------|-----|
| <b>Future therapies</b> <ul style="list-style-type: none"><li>• Currently there are 17 vaccines and antibodies in clinical development</li><li>• WHO estimates the availability of an RSV vaccine within 5-10 years</li><li>• Nanoparticle and subunit vaccines are the most promising for pregnant women, whereas live-attenuated, vector-based and subunit vaccines are optimal for the pediatric population</li><li>• Several new antibodies targeting the RSV fusion (F) protein are showing promise (e.g. MEI8897) and entering phase 3 immunoprophylaxis trials</li><li>• Recent efforts to develop RSV antiviral drugs have focused primarily on fusion inhibitors or virus gene silencing; a number are in development and could become available for clinical use within a few years</li></ul> | N/A |

## Limitations

- The most significant limitation is the lack of available therapies and interventions for RSV despite decades of research
- There is a strong body of evidence for palivizumab in key indicated groups (preterm, CLD/BPD, CHD), but more data in other high risk populations, such as those with Down syndrome or neurological disorders, would be welcome.

## Further development

### Currently approved therapies

- More up-to-date research and published, prospective RCTs are needed to determine:
  - Effectiveness of palivizumab in reducing RSVH and improving outcomes in children with underlying medical conditions
  - Ultimate impact of palivizumab on longer-term sequelae, such as recurrent wheezing

### Future therapies for prevention and treatment

- Continued research is needed on:
  - Optimal strategies, such as pre- versus post-natal vaccination and prophylaxis
  - Establishing whether there is a causal link between RSV infection and asthma, possibly via a follow-on to a phase 3 vaccine or prophylaxis trial
  - The optimal timing of therapy with antiviral drugs
  - Whether the combination of antiviral drugs and immunomodulatory therapies might improve outcomes

## Acknowledgments

- Sponsorship and article processing charges for this study were funded by AbbVie. Dr Joanne Smith, Julie Blake and Dr Barry Rodgers-Gray, from Strategen Limited, undertook the systematic review following protocol approval by the authors.
- Julie Blake and Dr Barry Rodgers-Gray provided editorial assistance in the preparation of this manuscript. Support for this assistance was funded by AbbVie.
- All named authors met the International Committee of Medical Journal Editors (ICMJE) criteria for authorship for this manuscript, took responsibility for the integrity of the work as a whole, and gave final approval for the published version of the manuscript.

## Disclosures

Louis Bont has regular interaction with pharmaceutical and other industrial partners. He has not received personal fees or other personal benefits. UMCU has received major funding (> €100,000 per industrial partner) for investigator initiated studies from AbbVie, MedImmune, Janssen, the Bill and Melinda Gates Foundation and MeMed Diagnostics. UMCU has received minor funding participation in trials by Regeneron and Janssen since 2015 (total annual estimate less than €20,000). He received minor funding for consultation and invited lectures by AbbVie, MedImmune, Ablynx, Bavaria Nordic, MabXience, Novavax, Janssen (total annual estimate less than €20,000). Paul Checchia has acted as an expert advisor and speaker for AbbVie and has received honoraria in this regard. He has also received research grant funding from AstraZeneca. Brigitte Fauroux has received compensation as a neonatology board member from AbbVie. Josep Figueras-Aloy has acted as an expert advisor and speaker for AbbVie and has received honoraria in this regard. Paolo Manzoni has acted as a speaker for AbbVie and as an expert advisor for AbbVie, TEVA, Medimmune, AstraZeneca, Janssen, and has received honoraria in this regard. Bosco Paes has received research funding from AbbVie Corporation and compensation as an advisor or lecturer from AbbVie and MedImmune. Eric Simões has received grant funding to his institution from Medimmune, Regeneron and Glaxo Smith Kline. Xavier Carbonell-Estrany has acted as an expert advisor and speaker for AbbVie and has received honoraria in this regard.



## Copyright

Copyright © The Authors 2018.

This slide deck is distributed under the terms of the Creative Commons Attribution Noncommercial License which permits any noncommercial use, distribution, and reproduction in any medium, provided the original author(s) and the source are credited.
